# Supplementary material
Source: publisher figshare collection journal article supplement (https://acs.figshare.com/ndownloader/files/4294714)
Supplement: Supplementary file 1 [file 4294714]

  
data_sr18 
  
_audit_creation_method            SHELXL-97 
_chemical_name_systematic 
; 
 ? 
; 
_chemical_name_common             ? 
_chemical_melting_point           ? 
_chemical_formula_moiety          
 'C31 H37 Fe N3'  
_chemical_formula_sum 
 'C31 H37 Fe N3' 
_chemical_formula_weight          507.49 
  
loop_ 
 _atom_type_symbol 
 _atom_type_description 
 _atom_type_scat_dispersion_real 
 _atom_type_scat_dispersion_imag 
 _atom_type_scat_source 
 'C'  'C'   0.0033   0.0016 
 'International Tables Vol C Tables 4.2.6.8 and 6.1.1.4' 
 'H'  'H'   0.0000   0.0000 
 'International Tables Vol C Tables 4.2.6.8 and 6.1.1.4' 
 'N'  'N'   0.0061   0.0033 
 'International Tables Vol C Tables 4.2.6.8 and 6.1.1.4' 
 'Fe'  'Fe'   0.3463   0.8444 
 'International Tables Vol C Tables 4.2.6.8 and 6.1.1.4' 
  
_symmetry_cell_setting            Orthorhombic 
_symmetry_space_group_name_H-M    Pbca 
  
loop_ 
 _symmetry_equiv_pos_as_xyz 
 'x, y, z' 
 '-x+1/2, -y, z+1/2' 
 '-x, y+1/2, -z+1/2' 
 'x+1/2, -y+1/2, -z' 
 '-x, -y, -z' 
 'x-1/2, y, -z-1/2' 
 'x, -y-1/2, z-1/2' 
 '-x-1/2, y-1/2, z' 
  
_cell_length_a                    17.5522(6) 
_cell_length_b                    10.4649(4) 
_cell_length_c                    28.3624(9) 
_cell_angle_alpha                 90.00 
_cell_angle_beta                  90.00 
_cell_angle_gamma                 90.00 
_cell_volume                      5209.7(3) 
_cell_formula_units_Z             8 
_cell_measurement_temperature     173(2) 
_cell_measurement_reflns_used     8334 
_cell_measurement_theta_min       2.38 
_cell_measurement_theta_max       29.07 
  
_exptl_crystal_description        block 
_exptl_crystal_colour             black 
_exptl_crystal_size_max           0.45 
_exptl_crystal_size_mid           0.30 
_exptl_crystal_size_min           0.20 
_exptl_crystal_density_meas       ? 
_exptl_crystal_density_diffrn     1.294 
_exptl_crystal_density_method     'not measured' 
_exptl_crystal_F_000              2160 
_exptl_absorpt_coefficient_mu     0.603 
_exptl_absorpt_correction_type    multi-scan 
_exptl_absorpt_correction_T_min   0.7730 
_exptl_absorpt_correction_T_max   0.8889 
_exptl_absorpt_process_details    SADABS 
  
_exptl_special_details 
; 
 ? 
; 
  
_diffrn_ambient_temperature       173(2) 
_diffrn_radiation_wavelength      0.71073 
_diffrn_radiation_type            MoK\a 
_diffrn_radiation_source          'fine-focus sealed tube' 
_diffrn_radiation_monochromator   graphite 
_diffrn_measurement_device_type   'Bruker X8 APEX II diffractometer' 
_diffrn_measurement_method        'phi and omega scans' 
_diffrn_detector_area_resol_mean  ? 
_diffrn_standards_number          0 
_diffrn_standards_interval_count  ? 
_diffrn_standards_interval_time   ? 
_diffrn_standards_decay_%         ? 
_diffrn_reflns_number             23930 
_diffrn_reflns_av_R_equivalents   0.0258 
_diffrn_reflns_av_sigmaI/netI     0.0299 
_diffrn_reflns_limit_h_min        -19 
_diffrn_reflns_limit_h_max        24 
_diffrn_reflns_limit_k_min        -14 
_diffrn_reflns_limit_k_max        10 
_diffrn_reflns_limit_l_min        -38 
_diffrn_reflns_limit_l_max        22 
_diffrn_reflns_theta_min          1.85 
_diffrn_reflns_theta_max          29.13 
_reflns_number_total              6984 
_reflns_number_gt                 5419 
_reflns_threshold_expression      >2sigma(I) 
  
_computing_data_collection        'Bruker APEX2' 
_computing_cell_refinement        'Bruker SAINT+' 
_computing_data_reduction         'Bruker SAINT+' 
_computing_structure_solution     'SHELXS-97 (Sheldrick, 1990)' 
_computing_structure_refinement   'SHELXL-97 (Sheldrick, 1997)' 
_computing_molecular_graphics     'Bruker SHELXTL' 
_computing_publication_material   'Bruker SHELXTL' 
  
_refine_special_details 
; 
 Refinement of F^2^ against ALL reflections.  The weighted R-factor wR and 
 goodness of fit S are based on F^2^, conventional R-factors R are based 
 on F, with F set to zero for negative F^2^. The threshold expression of 
 F^2^ > 2sigma(F^2^) is used only for calculating R-factors(gt) etc. and is 
 not relevant to the choice of reflections for refinement.  R-factors based 
 on F^2^ are statistically about twice as large as those based on F, and R- 
 factors based on ALL data will be even larger. 
; 
  
_refine_ls_structure_factor_coef  Fsqd 
_refine_ls_matrix_type            full 
_refine_ls_weighting_scheme       calc 
_refine_ls_weighting_details 
 'calc w=1/[\s^2^(Fo^2^)+(0.0587P)^2^+2.7890P] where P=(Fo^2^+2Fc^2^)/3' 
_atom_sites_solution_primary      direct 
_atom_sites_solution_secondary    difmap 
_atom_sites_solution_hydrogens    mixed
_refine_ls_hydrogen_treatment     mixed 
_refine_ls_extinction_method      none 
_refine_ls_extinction_coef        ? 
_refine_ls_number_reflns          6984 
_refine_ls_number_parameters      357 
_refine_ls_number_restraints      4 
_refine_ls_R_factor_all           0.0581 
_refine_ls_R_factor_gt            0.0413 
_refine_ls_wR_factor_ref          0.1165 
_refine_ls_wR_factor_gt           0.1067 
_refine_ls_goodness_of_fit_ref    1.014 
_refine_ls_restrained_S_all       1.014 
_refine_ls_shift/su_max           0.011 
_refine_ls_shift/su_mean          0.000 
  
loop_ 
 _atom_site_label 
 _atom_site_type_symbol 
 _atom_site_fract_x 
 _atom_site_fract_y 
 _atom_site_fract_z 
 _atom_site_U_iso_or_equiv 
 _atom_site_adp_type 
 _atom_site_occupancy 
 _atom_site_symmetry_multiplicity 
 _atom_site_calc_flag 
 _atom_site_refinement_flags 
 _atom_site_disorder_assembly 
 _atom_site_disorder_group 
Fe1 Fe 0.026348(13) 0.14670(2) 0.117340(8) 0.02134(8) Uani 1 1 d . . . 
N1 N 0.10750(8) 0.01544(14) 0.12459(5) 0.0262(3) Uani 1 1 d . B . 
N2 N 0.07101(8) 0.19925(14) 0.17277(5) 0.0249(3) Uani 1 1 d . B . 
N3 N -0.04906(9) 0.27269(14) 0.14031(5) 0.0248(3) Uani 1 1 d . B . 
C1 C 0.22791(13) -0.0394(2) 0.16740(10) 0.0523(6) Uani 1 1 d . B . 
H1A H 0.2130 -0.1148 0.1857 0.078 Uiso 1 1 calc R . . 
H1B H 0.2652 0.0106 0.1853 0.078 Uiso 1 1 calc R . . 
H1C H 0.2506 -0.0666 0.1375 0.078 Uiso 1 1 calc R . . 
C2 C 0.15904(11) 0.04099(18) 0.15778(7) 0.0323(4) Uani 1 1 d . . . 
C3 C 0.14058(11) 0.14915(18) 0.18574(7) 0.0297(4) Uani 1 1 d . B . 
C4 C 0.18040(12) 0.1991(2) 0.22380(7) 0.0381(5) Uani 1 1 d . . . 
H4A H 0.2274 0.1619 0.2332 0.046 Uiso 1 1 calc R B . 
C5 C 0.15158(13) 0.3034(2) 0.24816(7) 0.0399(5) Uani 1 1 d . B . 
H5A H 0.1779 0.3362 0.2748 0.048 Uiso 1 1 calc R . . 
C6 C 0.08457(13) 0.3591(2) 0.23342(7) 0.0360(4) Uani 1 1 d . . . 
H6A H 0.0658 0.4331 0.2489 0.043 Uiso 1 1 calc R B . 
C7 C 0.04427(11) 0.30639(18) 0.19559(6) 0.0284(4) Uani 1 1 d . B . 
C8 C -0.02712(11) 0.34371(17) 0.17675(6) 0.0295(4) Uani 1 1 d . . . 
C9 C -0.07499(13) 0.4486(2) 0.19827(8) 0.0426(5) Uani 1 1 d . B . 
H9A H -0.0848 0.5148 0.1746 0.064 Uiso 1 1 calc R . . 
H9B H -0.0477 0.4862 0.2250 0.064 Uiso 1 1 calc R . . 
H9C H -0.1235 0.4129 0.2092 0.064 Uiso 1 1 calc R . . 
C10 C 0.11378(10) -0.11109(17) 0.10433(7) 0.0280(4) Uani 1 1 d . . . 
C11 C 0.08099(13) -0.21259(19) 0.12961(8) 0.0370(4) Uani 1 1 d . B . 
C12 C 0.08686(15) -0.3354(2) 0.11125(9) 0.0466(6) Uani 1 1 d . . . 
H12A H 0.0646 -0.4049 0.1278 0.056 Uiso 1 1 calc R B . 
C13 C 0.12440(14) -0.3578(2) 0.06945(9) 0.0484(6) Uani 1 1 d . B . 
H13A H 0.1270 -0.4420 0.0570 0.058 Uiso 1 1 calc R . . 
C14 C 0.15810(12) -0.2584(2) 0.04572(8) 0.0411(5) Uani 1 1 d . . . 
H14A H 0.1847 -0.2751 0.0172 0.049 Uiso 1 1 calc R B . 
C15 C 0.15411(11) -0.13329(19) 0.06257(7) 0.0323(4) Uani 1 1 d . B . 
C16 C 0.04321(17) -0.1928(2) 0.17675(9) 0.0561(7) Uani 1 1 d . . . 
H16A H 0.0022 -0.2554 0.1807 0.084 Uiso 1 1 calc R B . 
H16B H 0.0219 -0.1063 0.1782 0.084 Uiso 1 1 calc R . . 
H16C H 0.0809 -0.2037 0.2019 0.084 Uiso 1 1 calc R . . 
C17 C 0.19505(12) -0.0291(2) 0.03709(9) 0.0461(5) Uani 1 1 d . . . 
H17A H 0.2486 -0.0531 0.0329 0.069 Uiso 1 1 calc R B . 
H17B H 0.1920 0.0500 0.0555 0.069 Uiso 1 1 calc R . . 
H17C H 0.1714 -0.0158 0.0062 0.069 Uiso 1 1 calc R . . 
C18 C -0.12768(11) 0.28696(18) 0.12644(6) 0.0298(4) Uani 1 1 d . . . 
C19 C -0.18190(12) 0.2096(2) 0.14892(8) 0.0397(5) Uani 1 1 d . B . 
C20 C -0.25732(14) 0.2154(3) 0.13336(10) 0.0558(7) Uani 1 1 d . . . 
H20A H -0.2943 0.1612 0.1474 0.067 Uiso 1 1 calc R B . 
C21 C -0.27901(15) 0.2971(3) 0.09846(11) 0.0643(8) Uani 1 1 d . B . 
H21A H -0.3303 0.2977 0.0877 0.077 Uiso 1 1 calc R . . 
C22 C -0.22641(17) 0.3786(3) 0.07887(9) 0.0601(8) Uani 1 1 d . . . 
H22A H -0.2426 0.4386 0.0558 0.072 Uiso 1 1 calc R B . 
C23 C -0.14929(14) 0.3756(2) 0.09208(7) 0.0413(5) Uani 1 1 d . B . 
C24 C -0.16041(15) 0.1261(3) 0.18974(9) 0.0553(7) Uani 1 1 d . . . 
H24A H -0.1553 0.1784 0.2182 0.083 Uiso 1 1 calc R B . 
H24B H -0.1118 0.0837 0.1830 0.083 Uiso 1 1 calc R . . 
H24C H -0.2000 0.0615 0.1946 0.083 Uiso 1 1 calc R . . 
C25 C -0.09288(18) 0.4675(2) 0.07127(9) 0.0586(7) Uani 1 1 d . . . 
H25A H -0.0413 0.4438 0.0813 0.088 Uiso 1 1 calc R B . 
H25B H -0.1044 0.5542 0.0822 0.088 Uiso 1 1 calc R . . 
H25C H -0.0961 0.4644 0.0368 0.088 Uiso 1 1 calc R . . 
C26 C 0.09977(12) 0.27796(18) 0.08626(7) 0.0307(4) Uani 1 1 d D B . 
C27 C 0.09893(18) 0.2892(3) 0.03337(8) 0.0632(8) Uani 1 1 d . . . 
H27A H 0.0954 0.3807 0.0247 0.076 Uiso 1 1 calc R A 1 
H27B H 0.1477 0.2561 0.0208 0.076 Uiso 1 1 calc R A 1 
C28 C 0.03663(15) 0.2207(3) 0.01108(8) 0.0575(7) Uani 0.437(8) 1 d P B 1 
H28A H 0.0513 0.1911 -0.0196 0.069 Uiso 0.437(8) 1 d P B 1 
H28B H -0.0067 0.2765 0.0076 0.069 Uiso 0.437(8) 1 d P B 1 
C29 C 0.0163(4) 0.1084(6) 0.04294(18) 0.0332(14) Uani 0.437(8) 1 d P B 1 
H29A H 0.0418 0.0275 0.0329 0.040 Uiso 0.437(8) 1 d P B 1 
C30 C -0.0521(3) 0.0913(5) 0.06550(18) 0.0366(16) Uani 0.437(8) 1 d P B 1 
H30A H -0.0968 0.1469 0.0578 0.044 Uiso 0.437(8) 1 calc PR B 1 
C28' C 0.03663(15) 0.2207(3) 0.01108(8) 0.0575(7) Uani 0.563(8) 1 d P B 2 
H28C H 0.0568 0.1533 -0.0080 0.069 Uiso 0.563(8) 1 d P B 2 
H28D H 0.0100 0.2789 -0.0094 0.069 Uiso 0.563(8) 1 d P B 2 
C29' C -0.0170(3) 0.1675(5) 0.04416(13) 0.0375(13) Uani 0.563(8) 1 d P B 2 
H29B H -0.0698 0.2029 0.0419 0.045 Uiso 0.563(8) 1 d P B 2 
C30' C -0.0134(3) 0.0435(5) 0.05881(16) 0.0413(14) Uani 0.563(8) 1 d P B 2 
H30B H 0.0208 -0.0186 0.0424 0.050 Uiso 0.563(8) 1 calc PR B 2 
C31 C -0.05691(12) 0.0038(2) 0.09990(9) 0.0416(5) Uani 1 1 d D B . 
H26B H 0.0875(15) 0.3615(19) 0.1007(9) 0.057(8) Uiso 1 1 d D . . 
H26A H 0.1502(11) 0.254(3) 0.0989(9) 0.059(8) Uiso 1 1 d D . . 
H31B H -0.0400(16) -0.0831(18) 0.1025(10) 0.067(9) Uiso 1 1 d D . . 
H31A H -0.1076(12) 0.027(3) 0.1077(11) 0.085(10) Uiso 1 1 d D . . 
  
loop_ 
 _atom_site_aniso_label 
 _atom_site_aniso_U_11 
 _atom_site_aniso_U_22 
 _atom_site_aniso_U_33 
 _atom_site_aniso_U_23 
 _atom_site_aniso_U_13 
 _atom_site_aniso_U_12 
Fe1 0.02126(13) 0.02018(12) 0.02260(13) -0.00267(9) -0.00080(9) -0.00068(9) 
N1 0.0246(7) 0.0222(7) 0.0318(8) -0.0015(6) 0.0000(6) 0.0002(6) 
N2 0.0274(8) 0.0247(7) 0.0226(7) -0.0013(6) -0.0018(6) -0.0019(6) 
N3 0.0288(7) 0.0240(7) 0.0217(7) 0.0013(5) 0.0012(6) 0.0035(6) 
C1 0.0418(13) 0.0518(14) 0.0632(15) -0.0048(12) -0.0187(11) 0.0177(11) 
C2 0.0284(9) 0.0310(9) 0.0376(10) 0.0015(8) -0.0053(8) 0.0032(7) 
C3 0.0298(9) 0.0298(9) 0.0293(9) 0.0023(7) -0.0055(7) -0.0025(7) 
C4 0.0379(11) 0.0436(11) 0.0329(10) 0.0039(9) -0.0118(9) -0.0055(9) 
C5 0.0480(13) 0.0465(11) 0.0253(9) -0.0031(9) -0.0078(9) -0.0119(10) 
C6 0.0477(12) 0.0362(10) 0.0242(9) -0.0064(8) 0.0010(8) -0.0081(9) 
C7 0.0362(10) 0.0270(8) 0.0221(8) -0.0015(7) 0.0039(7) -0.0029(7) 
C8 0.0395(10) 0.0259(8) 0.0232(8) -0.0009(7) 0.0037(7) 0.0035(7) 
C9 0.0554(14) 0.0382(11) 0.0341(10) -0.0096(9) 0.0039(10) 0.0136(10) 
C10 0.0266(9) 0.0233(8) 0.0342(9) -0.0016(7) 0.0012(7) 0.0033(7) 
C11 0.0447(12) 0.0273(9) 0.0390(10) 0.0019(8) 0.0069(9) 0.0026(8) 
C12 0.0593(15) 0.0245(9) 0.0562(14) 0.0043(9) 0.0085(11) -0.0007(9) 
C13 0.0574(15) 0.0285(10) 0.0594(15) -0.0106(10) 0.0022(12) 0.0081(10) 
C14 0.0394(12) 0.0417(11) 0.0421(11) -0.0079(9) 0.0062(9) 0.0133(9) 
C15 0.0262(9) 0.0349(10) 0.0358(10) -0.0003(8) 0.0028(7) 0.0065(8) 
C16 0.0800(19) 0.0435(13) 0.0447(13) 0.0048(11) 0.0205(13) -0.0038(13) 
C17 0.0321(11) 0.0513(13) 0.0549(14) 0.0091(11) 0.0172(10) 0.0042(10) 
C18 0.0313(9) 0.0315(9) 0.0266(9) -0.0032(7) -0.0011(7) 0.0127(7) 
C19 0.0286(10) 0.0447(12) 0.0459(12) -0.0063(10) 0.0074(9) 0.0080(9) 
C20 0.0298(11) 0.0643(16) 0.0733(17) -0.0222(14) 0.0051(11) 0.0097(11) 
C21 0.0390(14) 0.0714(19) 0.082(2) -0.0293(16) -0.0160(14) 0.0260(14) 
C22 0.0706(18) 0.0595(16) 0.0501(14) -0.0137(12) -0.0254(13) 0.0396(15) 
C23 0.0562(14) 0.0368(11) 0.0310(10) -0.0019(8) -0.0056(9) 0.0207(10) 
C24 0.0491(14) 0.0634(16) 0.0533(14) 0.0182(12) 0.0226(12) -0.0004(12) 
C25 0.093(2) 0.0403(12) 0.0429(13) 0.0159(10) 0.0023(13) 0.0191(13) 
C26 0.0354(10) 0.0267(9) 0.0299(9) -0.0001(7) -0.0009(8) -0.0051(8) 
C27 0.090(2) 0.0696(18) 0.0303(11) 0.0110(11) -0.0034(12) -0.0431(16) 
C28 0.0568(15) 0.087(2) 0.0282(11) -0.0036(12) -0.0046(10) -0.0087(14) 
C29 0.035(3) 0.037(3) 0.027(2) -0.009(2) -0.006(2) 0.002(3) 
C30 0.025(3) 0.043(3) 0.042(3) -0.024(2) -0.011(2) 0.005(2) 
C28' 0.0568(15) 0.087(2) 0.0282(11) -0.0036(12) -0.0046(10) -0.0087(14) 
C29' 0.029(2) 0.059(3) 0.0246(17) -0.0120(17) -0.0041(15) -0.007(2) 
C30' 0.029(2) 0.049(3) 0.046(2) -0.028(2) -0.0121(18) 0.009(2) 
C31 0.0276(10) 0.0318(10) 0.0653(15) -0.0155(10) -0.0068(10) -0.0037(8) 
  
_geom_special_details 
; 
 All esds (except the esd in the dihedral angle between two l.s. planes) 
 are estimated using the full covariance matrix.  The cell esds are taken 
 into account individually in the estimation of esds in distances, angles 
 and torsion angles; correlations between esds in cell parameters are only 
 used when they are defined by crystal symmetry.  An approximate (isotropic) 
 treatment of cell esds is used for estimating esds involving l.s. planes. 
; 
  
loop_ 
 _geom_bond_atom_site_label_1 
 _geom_bond_atom_site_label_2 
 _geom_bond_distance 
 _geom_bond_site_symmetry_2 
 _geom_bond_publ_flag 
Fe1 N2 1.8407(14) . ? 
Fe1 N3 1.9785(15) . ? 
Fe1 N1 1.9895(15) . ? 
Fe1 C26 2.0797(19) . ? 
Fe1 C30 2.096(4) . ? 
Fe1 C30' 2.100(4) . ? 
Fe1 C31 2.149(2) . ? 
Fe1 C29 2.155(5) . ? 
Fe1 C29' 2.221(4) . ? 
N1 C2 1.333(2) . ? 
N1 C10 1.448(2) . ? 
N2 C7 1.377(2) . ? 
N2 C3 1.379(2) . ? 
N3 C8 1.330(2) . ? 
N3 C18 1.443(2) . ? 
C1 C2 1.498(3) . ? 
C2 C3 1.419(3) . ? 
C3 C4 1.388(3) . ? 
C4 C5 1.387(3) . ? 
C5 C6 1.377(3) . ? 
C6 C7 1.399(3) . ? 
C7 C8 1.417(3) . ? 
C8 C9 1.511(3) . ? 
C10 C15 1.399(3) . ? 
C10 C11 1.405(3) . ? 
C11 C12 1.390(3) . ? 
C11 C16 1.507(3) . ? 
C12 C13 1.377(3) . ? 
C13 C14 1.373(3) . ? 
C14 C15 1.395(3) . ? 
C15 C17 1.493(3) . ? 
C18 C23 1.398(3) . ? 
C18 C19 1.403(3) . ? 
C19 C20 1.397(3) . ? 
C19 C24 1.499(3) . ? 
C20 C21 1.362(4) . ? 
C21 C22 1.375(4) . ? 
C22 C23 1.405(4) . ? 
C23 C25 1.501(4) . ? 
C26 C27 1.505(3) . ? 
C27 C28 1.453(4) . ? 
C28 C29 1.524(7) . ? 
C29 C30 1.372(10) . ? 
C30 C31 1.341(6) . ? 
C29' C30' 1.364(8) . ? 
C30' C31 1.454(6) . ? 
  
loop_ 
 _geom_angle_atom_site_label_1 
 _geom_angle_atom_site_label_2 
 _geom_angle_atom_site_label_3 
 _geom_angle 
 _geom_angle_site_symmetry_1 
 _geom_angle_site_symmetry_3 
 _geom_angle_publ_flag 
N2 Fe1 N3 78.74(6) . . ? 
N2 Fe1 N1 79.23(6) . . ? 
N3 Fe1 N1 154.83(6) . . ? 
N2 Fe1 C26 84.31(7) . . ? 
N3 Fe1 C26 96.55(7) . . ? 
N1 Fe1 C26 93.22(7) . . ? 
N2 Fe1 C30 164.03(17) . . ? 
N3 Fe1 C30 88.60(17) . . ? 
N1 Fe1 C30 110.61(17) . . ? 
C26 Fe1 C30 107.00(17) . . ? 
N2 Fe1 C30' 166.02(16) . . ? 
N3 Fe1 C30' 112.37(14) . . ? 
N1 Fe1 C30' 87.97(14) . . ? 
C26 Fe1 C30' 102.16(17) . . ? 
C30 Fe1 C30' 23.78(15) . . ? 
N2 Fe1 C31 133.96(9) . . ? 
N3 Fe1 C31 94.86(8) . . ? 
N1 Fe1 C31 91.72(8) . . ? 
C26 Fe1 C31 141.59(9) . . ? 
C30 Fe1 C31 36.80(17) . . ? 
C30' Fe1 C31 40.00(17) . . ? 
N2 Fe1 C29 157.92(19) . . ? 
N3 Fe1 C29 113.04(19) . . ? 
N1 Fe1 C29 91.81(19) . . ? 
C26 Fe1 C29 76.02(18) . . ? 
C30 Fe1 C29 37.6(3) . . ? 
C30' Fe1 C29 26.24(17) . . ? 
C31 Fe1 C29 65.76(19) . . ? 
N2 Fe1 C29' 156.14(14) . . ? 
N3 Fe1 C29' 90.75(16) . . ? 
N1 Fe1 C29' 114.17(16) . . ? 
C26 Fe1 C29' 75.59(12) . . ? 
C30 Fe1 C29' 31.44(18) . . ? 
C30' Fe1 C29' 36.7(2) . . ? 
C31 Fe1 C29' 67.69(14) . . ? 
C29 Fe1 C29' 22.37(15) . . ? 
C2 N1 C10 114.35(15) . . ? 
C2 N1 Fe1 114.86(12) . . ? 
C10 N1 Fe1 130.17(12) . . ? 
C7 N2 C3 119.08(15) . . ? 
C7 N2 Fe1 119.97(12) . . ? 
C3 N2 Fe1 119.43(12) . . ? 
C8 N3 C18 115.53(15) . . ? 
C8 N3 Fe1 115.75(12) . . ? 
C18 N3 Fe1 128.25(12) . . ? 
N1 C2 C3 113.56(16) . . ? 
N1 C2 C1 124.32(18) . . ? 
C3 C2 C1 122.03(18) . . ? 
N2 C3 C4 120.67(18) . . ? 
N2 C3 C2 110.87(16) . . ? 
C4 C3 C2 128.30(19) . . ? 
C3 C4 C5 120.0(2) . . ? 
C6 C5 C4 119.53(18) . . ? 
C5 C6 C7 119.86(19) . . ? 
N2 C7 C6 120.62(18) . . ? 
N2 C7 C8 110.39(16) . . ? 
C6 C7 C8 128.90(18) . . ? 
N3 C8 C7 113.27(16) . . ? 
N3 C8 C9 123.98(18) . . ? 
C7 C8 C9 122.65(17) . . ? 
C15 C10 C11 120.91(17) . . ? 
C15 C10 N1 121.77(17) . . ? 
C11 C10 N1 117.24(16) . . ? 
C12 C11 C10 118.51(19) . . ? 
C12 C11 C16 119.5(2) . . ? 
C10 C11 C16 121.94(19) . . ? 
C13 C12 C11 121.0(2) . . ? 
C14 C13 C12 120.0(2) . . ? 
C13 C14 C15 121.4(2) . . ? 
C14 C15 C10 118.10(19) . . ? 
C14 C15 C17 119.70(19) . . ? 
C10 C15 C17 122.15(18) . . ? 
C23 C18 C19 121.05(19) . . ? 
C23 C18 N3 121.21(19) . . ? 
C19 C18 N3 117.73(17) . . ? 
C18 C19 C20 118.3(2) . . ? 
C18 C19 C24 121.13(19) . . ? 
C20 C19 C24 120.5(2) . . ? 
C21 C20 C19 121.4(3) . . ? 
C20 C21 C22 119.7(2) . . ? 
C21 C22 C23 121.7(2) . . ? 
C18 C23 C22 117.5(2) . . ? 
C18 C23 C25 121.3(2) . . ? 
C22 C23 C25 121.1(2) . . ? 
C27 C26 Fe1 117.91(14) . . ? 
C28 C27 C26 113.7(2) . . ? 
C27 C28 C29 107.4(3) . . ? 
C30 C29 C28 125.6(6) . . ? 
C30 C29 Fe1 68.9(3) . . ? 
C28 C29 Fe1 114.7(3) . . ? 
C31 C30 C29 118.9(6) . . ? 
C31 C30 Fe1 73.7(2) . . ? 
C29 C30 Fe1 73.5(3) . . ? 
C30' C29' Fe1 66.8(2) . . ? 
C29' C30' C31 119.5(4) . . ? 
C29' C30' Fe1 76.5(2) . . ? 
C31 C30' Fe1 71.82(18) . . ? 
C30 C31 C30' 35.8(3) . . ? 
C30 C31 Fe1 69.5(2) . . ? 
C30' C31 Fe1 68.18(17) . . ? 
  
_diffrn_measured_fraction_theta_max    0.996 
_diffrn_reflns_theta_full              29.13 
_diffrn_measured_fraction_theta_full   0.996 
_refine_diff_density_max    0.391 
_refine_diff_density_min   -0.435 
_refine_diff_density_rms    0.057 
